# Supplementary material for: Trace manganese detection via differential pulse cathodic stripping voltammetry using disposable electrodes: additively manufactured nanographite electrochemical sensing platforms
Source: Royal Society of Chemistry journal article supplement (doi:10.1039/d0an00018c), 2020-01-01
Supplement: d0an00018c1.pdf [file d0an00018c1.pdf]

**Trace manganese detection via differential pulse cathodic stripping voltammetry using disposable electrodes: additively manufactured nanographite electrochemical sensing platforms**

*Diego P. Rocha<sup>ab</sup>, Christopher W. Foster<sup>a</sup>, Rodrigo A. A. Munoz<sup>b</sup>, Gary A. Buller,<sup>a</sup>*

*Edmund M. Keefe<sup>a</sup> and Craig E. Banks<sup>a\*</sup>*

<sup>a</sup> Faculty of Science and Engineering, Manchester Metropolitan University, Chester Street, Manchester, M1 5GD, UK

<sup>b</sup> Institute of Chemistry, Federal University of Uberlandia, 38400-902, Uberlandia, Minas Gerais, Brazil

Corresponding author:

E-mail: c.banks@mmu.ac.uk (Craig E. Banks) ; +44 (0)161 247 119

**ESI Table 1.** Optimisation of the manganese (II) detection using cathodic stripping voltammetry

| Variables                 | Studied range | Selected value |
|---------------------------|---------------|----------------|
| pH                        | 2 – 9         | 6              |
| Deposition potential (V)  | 0.8 – 1.2     | 1.05           |
| Time of deposition (s)    | 0 – 450       | 350            |
| Stirring rate (rpm)       | 0 – 2500      | 1500           |
| Step potential (mV)       | 1 – 12        | 8              |
| Modulation amplitude (mV) | 25 – 500      | 250            |
| Modulation time (s)       | 0.005 – 0.100 | 0.02           |

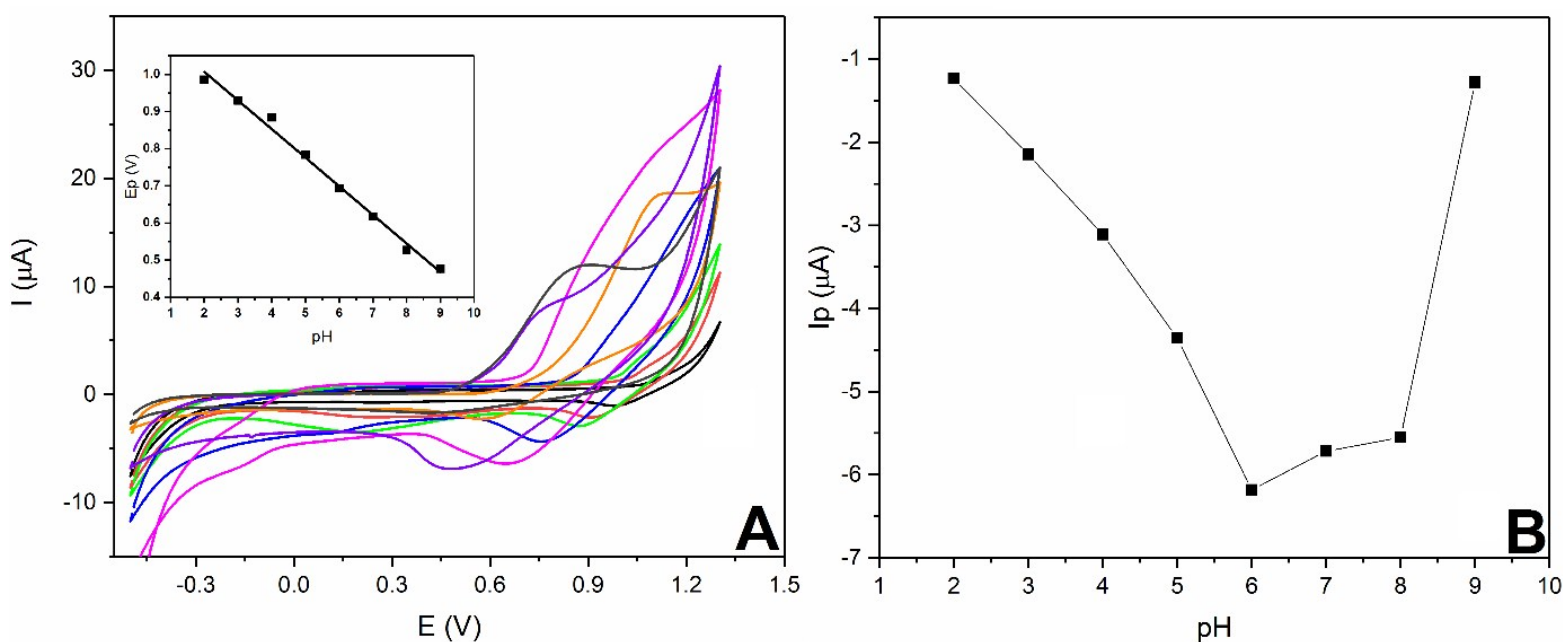

**Figure ESI-1.** (A) Cyclic voltammograms recordings containing  $1.8 \times 10^{-3} \text{ mol L}^{-1}$  of  $Mn^{2+}$  in BR  $0.04 \text{ mol L}^{-1}$  at pH 2 (black line), pH 3 (red line), pH 4 (green line), pH 5 (blue line), pH 6 (magenta line), pH 7 (orange line), pH 8 (yellow line), and pH 9 (cyan line).

(blue line), pH 6 (pink line), pH 7 (orange line), pH 8 (purple line) and pH 9 (grey line).

(B) Voltammetric response vs pH of the supporting electrolyte for the voltammograms in

(A). The inset in (A) corresponds the dependence of  $\text{MnO}_2$  reduction potential ( $E_p$ ) on pH of background electrolyte.

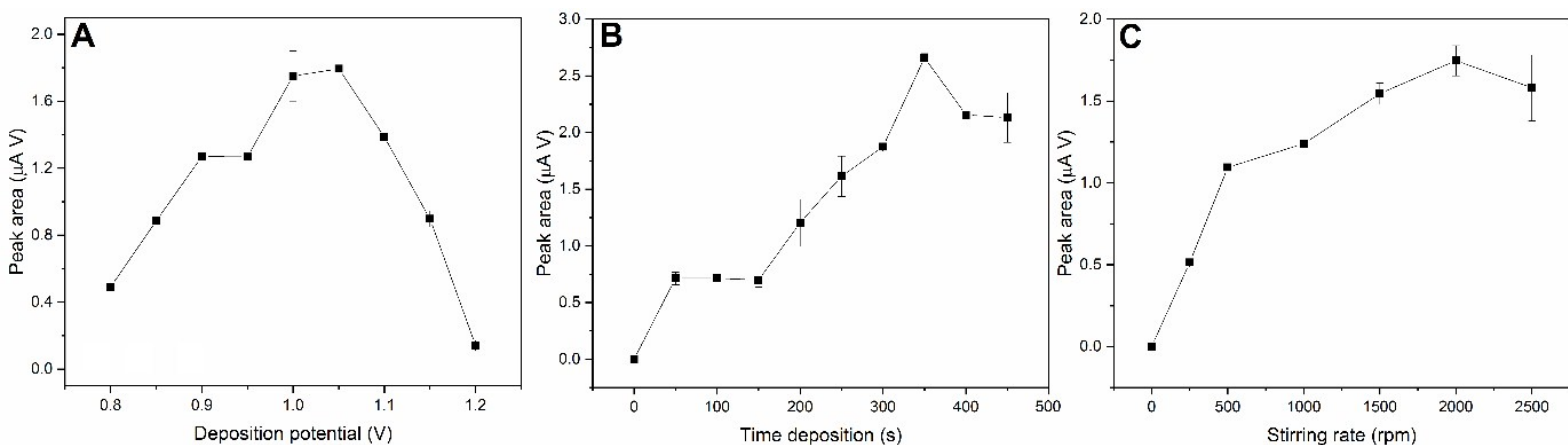

**Figure ESI-2. (A) Deposition potential optimization.** DPCSV conditions: 240 s of  $\text{MnO}_2$  deposition; stirring rate: 1000 rpm; scan from +1.4 to -0.4 V; step potential = 10 mV, interval time = 0.1 s, modulation amplitude = 150 mV; modulation time = 0.02 s and standby potential = 0.0 V. **(B) Deposition time optimization.** DPCSV conditions: deposition potential: +1.05 V; other conditions are the same of Fig. ESI-2 (A). **(C) Stirring rate optimization.** DPCSV conditions: time deposition: 350 s; other conditions are the same of Fig. ESI-2 (B). The deposition potential optimization, time deposition optimization and stirring rate optimization were carried out in the presence of  $1.1 \mu\text{mol L}^{-1}$  of  $\text{Mn}^{2+}$  using BR buffer (pH 6.0) as supporting electrolyte.

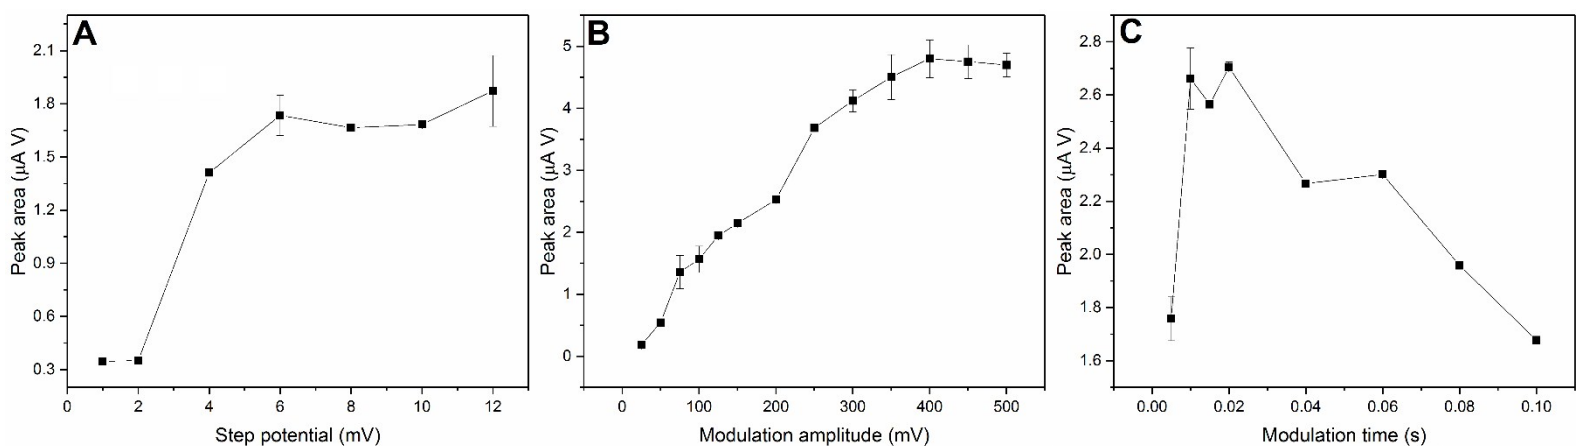

**Figure ESI-3. (A) Step potential optimization.** DPCSV conditions: deposition potential: +1.05 V; time deposition: 350 s; scan from +1.4 to -0.4 V; stirring rate: 1500 rpm; interval time = 0.1 s, modulation amplitude = 150 mV; modulation time = 0.02 s and standby potential = 0.0 V. **(B) Modulation amplitude optimization.** DPCSV conditions: step potential = 8 mV; other conditions are the same of Fig. ESI-3 (A). **(C) Modulation time optimization.** DPCSV conditions: modulation amplitude = 250 mV; other conditions are the same of Fig. ESI-3 (B). The optimization studies of step potential, modulation amplitude and modulation time were made using  $1.1 \mu\text{mol L}^{-1}$  of  $\text{Mn}^{2+}$  in BR buffer (pH 6.0) as supporting electrolyte.

**ESI Table 2.** Trace metals contents in reference material of drinking water (Level 2, ALPHA APS-1075).

| Element   | Concentration<br>( $\mu\text{g mL}^{-1}$ ) | Element    | Concentration<br>( $\mu\text{g mL}^{-1}$ ) |
|-----------|--------------------------------------------|------------|--------------------------------------------|
| Aluminium | 120                                        | Manganese  | 40                                         |
| Arsenic   | 80                                         | Molybdenum | 100                                        |
| Antimony  | 10                                         | Nickel     | 60                                         |
| Barium    | 50                                         | Potassium  | 2500                                       |
| Beryllium | 20                                         | Rubidium   | 10                                         |
| Bismuth   | 10                                         | Selenium   | 10                                         |
| Cadmium   | 10                                         | Silver     | 2                                          |
| Calcium   | 35000                                      | Sodium     | 6000                                       |
| Chromium  | 20                                         | Strontium  | 250                                        |
| Cobalt    | 25                                         | Tellurium  | 3                                          |
| Copper    | 20                                         | Thallium   | 10                                         |
| Iron      | 100                                        | Uranium    | 10                                         |
| Lead      | 40                                         | Vanadium   | 30                                         |
| Lithium   | 20                                         | Zinc       | 70                                         |
| Magnesium | 9000                                       |            |                                            |

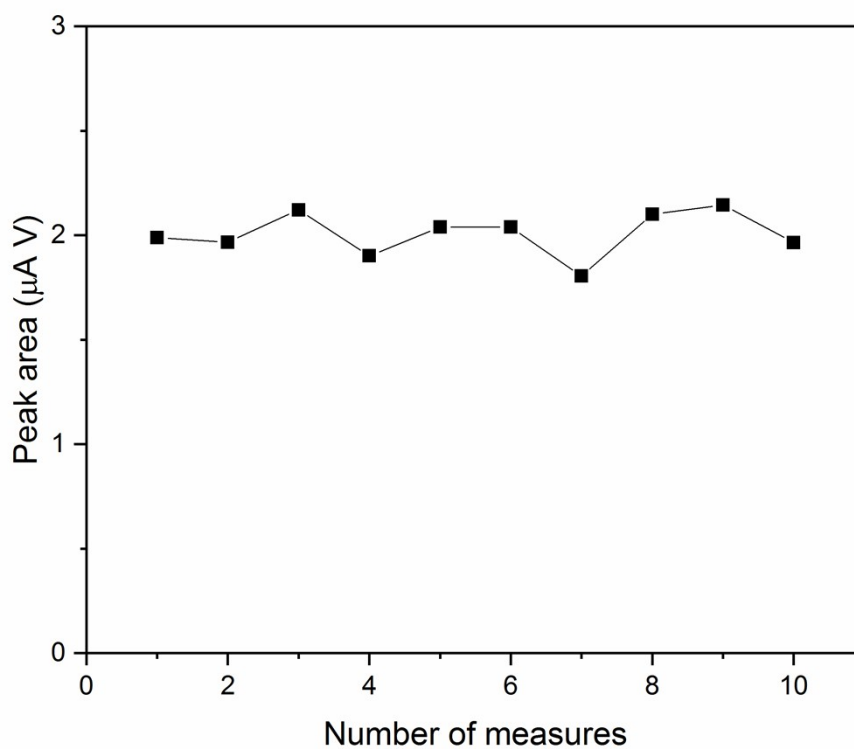

**Figure ESI-4.** Repeatability study ( $N = 10$ ) for  $1 \mu\text{mol L}^{-1}$  of manganese (II) using the AM-electrodes. DPCSV conditions: deposition potential:  $+1.05 \text{ V}$ ; time deposition:  $350 \text{ s}$ ; scan from  $+1.4$  to  $-0.4 \text{ V}$ ; stirring rate:  $1500 \text{ rpm}$ ; interval time =  $0.1 \text{ s}$ , step potential =  $8 \text{ mV}$ ; modulation amplitude =  $250 \text{ mV}$ , modulation time =  $0.02 \text{ s}$  and standby potential =  $0.0 \text{ V}$ . Supporting electrolyte: BR buffer (pH 6.0).

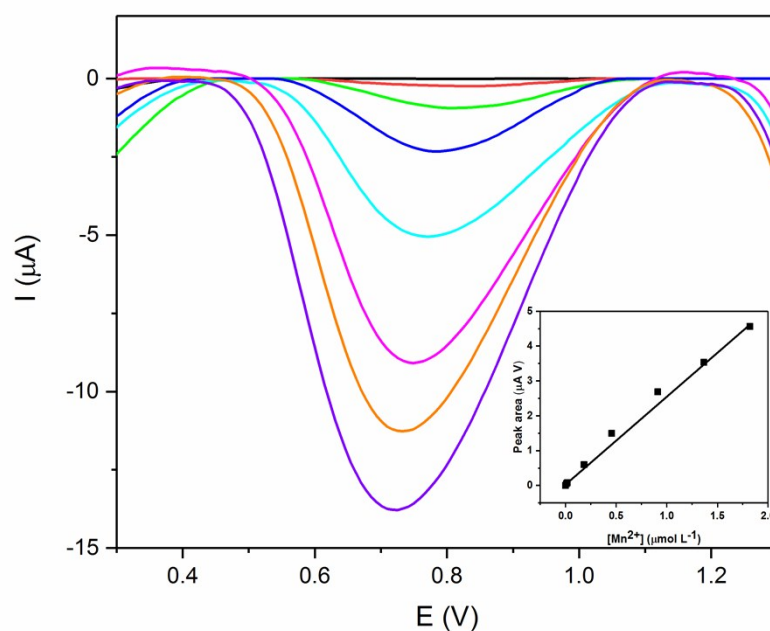

**Figure ESI-5.** Background-corrected differential-pulse cathodic stripping voltammograms of increasing concentrations of manganese (II) using SPEs: blank (black line); red line ( $9.10 \times 10^{-9}$  mol L<sup>-1</sup> / 0.5 μg L<sup>-1</sup>); green line ( $1.82 \times 10^{-8}$  mol L<sup>-1</sup> / 1.0 μg L<sup>-1</sup>); blue line ( $1.82 \times 10^{-7}$  mol L<sup>-1</sup> / 10.0 μg L<sup>-1</sup>); cyan line ( $4.55 \times 10^{-7}$  mol L<sup>-1</sup> / 25.0 μg L<sup>-1</sup>); pink line ( $9.10 \times 10^{-7}$  mol L<sup>-1</sup> / 50.0 μg L<sup>-1</sup>); orange line ( $1.37 \times 10^{-6}$  mol L<sup>-1</sup> / 75.0 μg L<sup>-1</sup>); purple line ( $1.82 \times 10^{-6}$  mol L<sup>-1</sup> / 100.0 μg L<sup>-1</sup>). Insert is a plot of peak area verses manganese (II) concentrations. CSDPV conditions: deposition potential: +1.05 V; time deposition: 350 s; scan from +1.4 to -0.4 V; stirring rate: 1500 rpm; interval time = 0.1 s, step potential = 8 mV; modulation amplitude = 250 mV, modulation time = 0.02 s and standby potential = 0.0 V. Supporting electrolyte: BR buffer (pH 6.0).

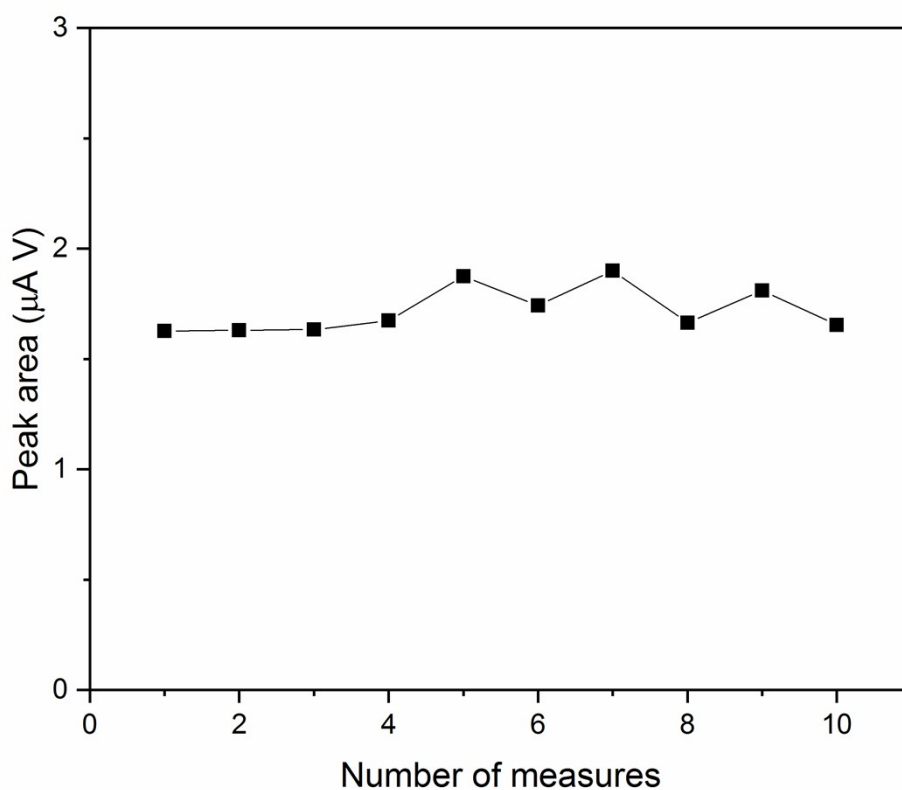

**Figure ESI-6.** Repeatability study ( $N = 10$ ) for  $1 \mu\text{mol L}^{-1}$  of manganese (II) using SPEs. DPCSV conditions: deposition potential:  $+1.05 \text{ V}$ ; time deposition:  $350 \text{ s}$ ; scan from  $+1.4$  to  $-0.4 \text{ V}$ ; stirring rate:  $1500 \text{ rpm}$ ; interval time =  $0.1 \text{ s}$ , step potential =  $8 \text{ mV}$ ; modulation amplitude =  $250 \text{ mV}$ , modulation time =  $0.02 \text{ s}$  and standby potential =  $0.0 \text{ V}$ . Supporting electrolyte: BR buffer (pH 6.0).
